# Supplementary material
Source: publisher site journal article supplement (https://www.dovepress.com/article/598057)

**a**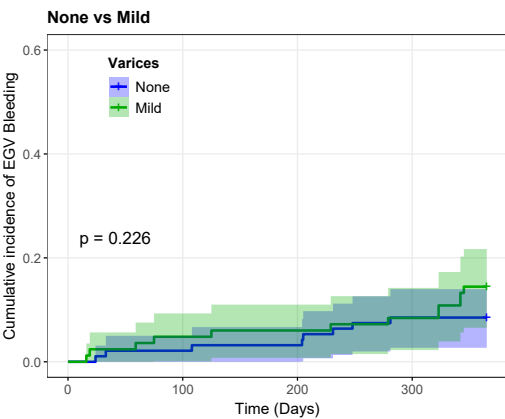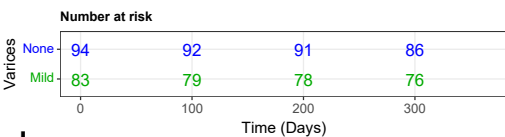**b**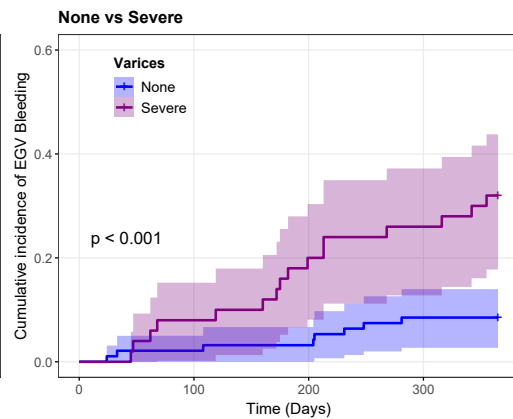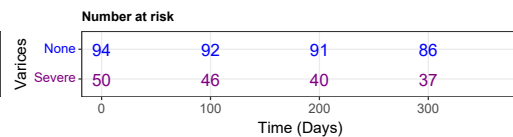**c**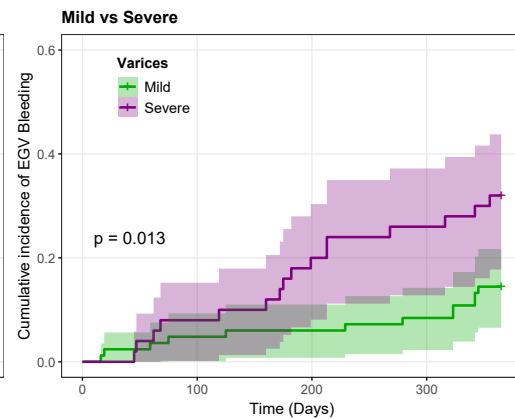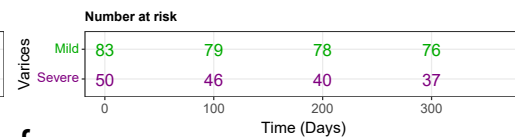**d**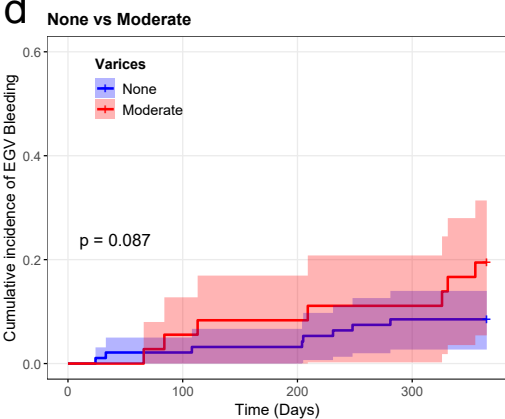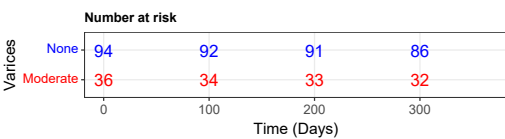**e**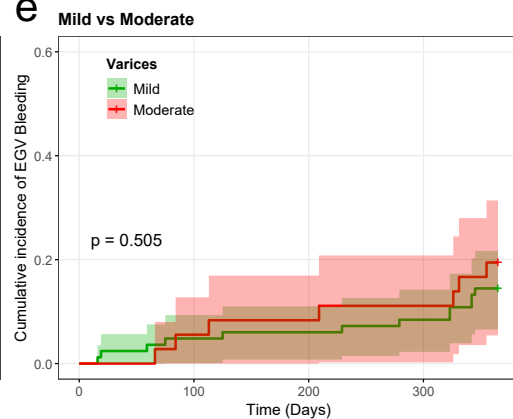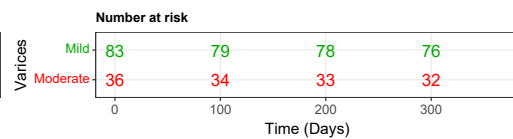**f**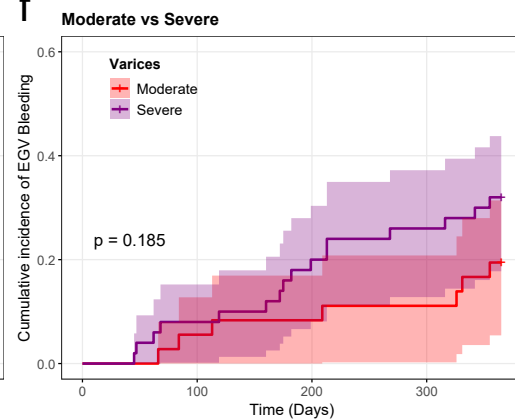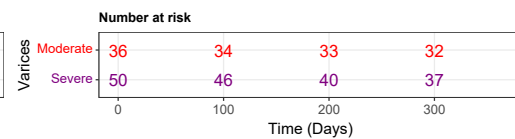

Supplement: Supplementary file 1 [file Supplementary Figure 1.pdf › Supplementary Figure 1.pdf]

a

## None vs Mild

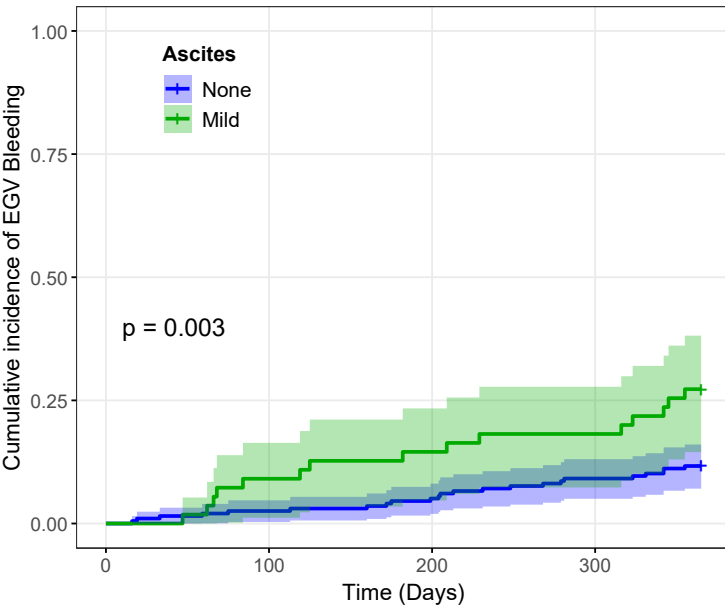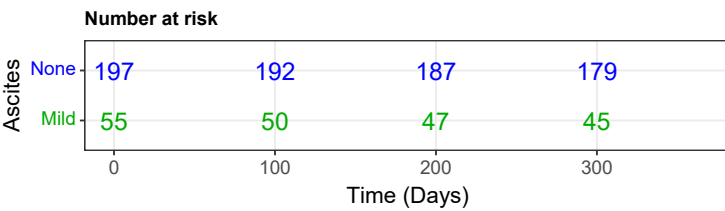

b

## None vs Moderate-severe

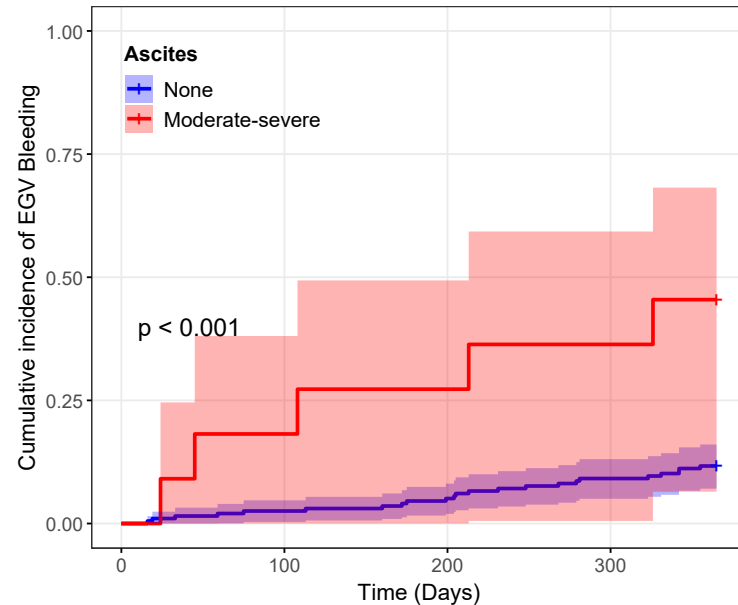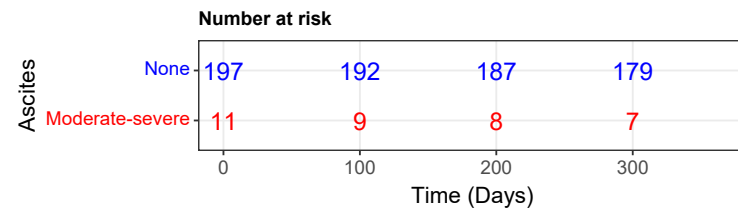

c

## Mild vs Moderate-severe

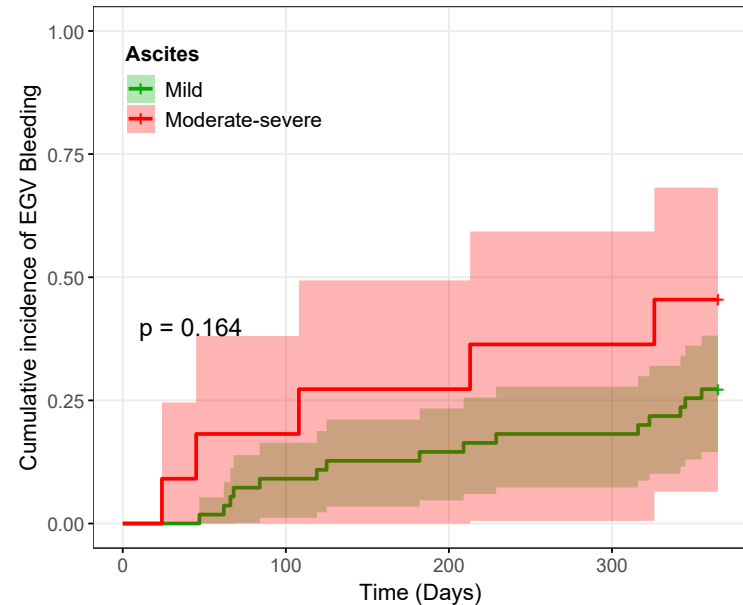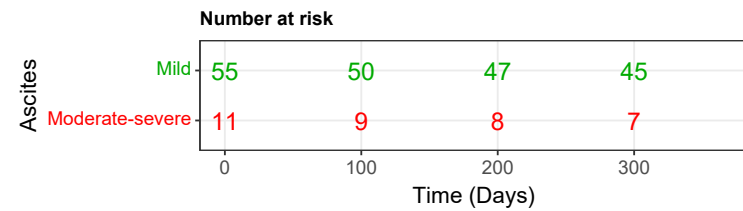

Supplement: Supplementary file 2 [file Supplementary Figure 2.pdf › Supplementary Figure 2.pdf]

a

CR/PR vs SD

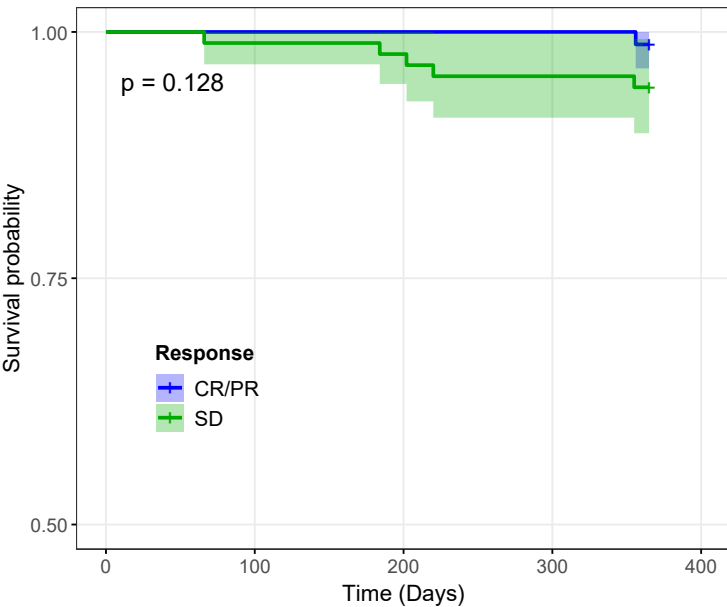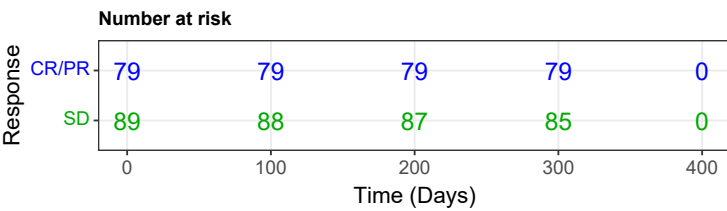

b

CR/PR vs PD

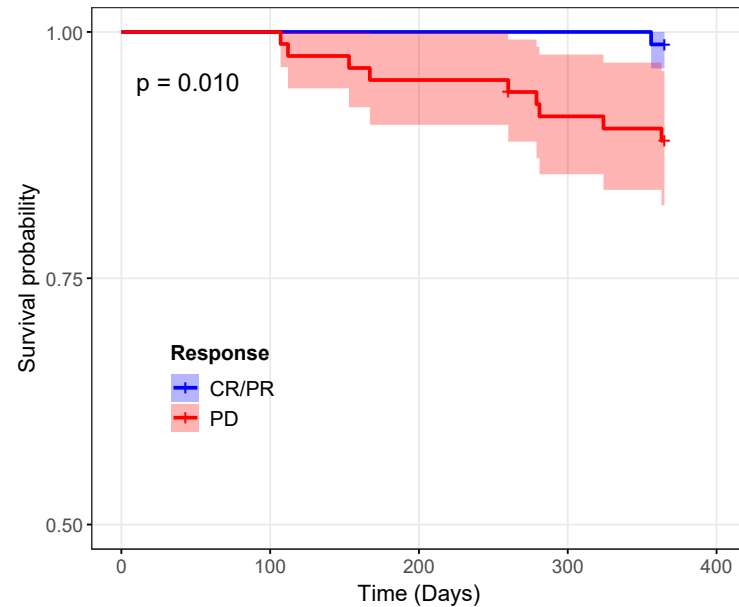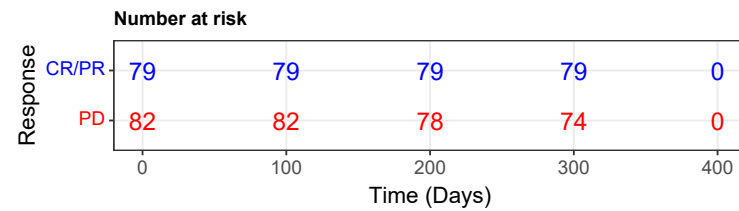

c

SD vs PD

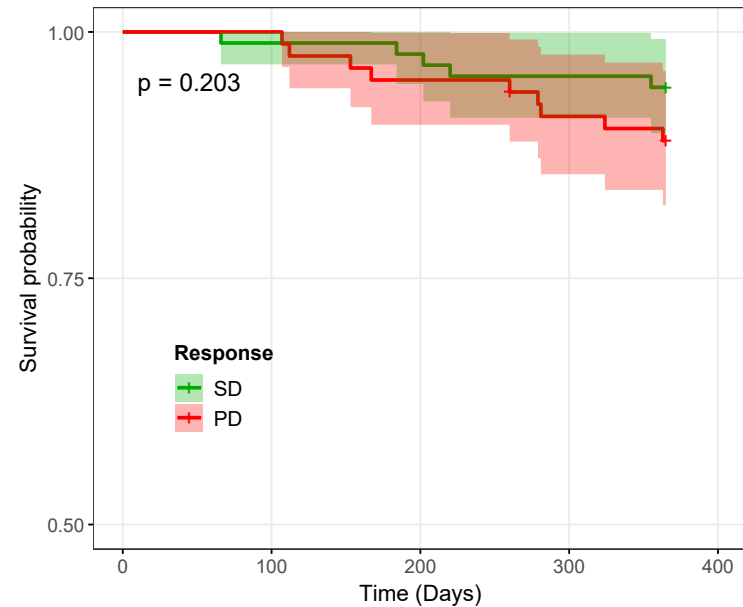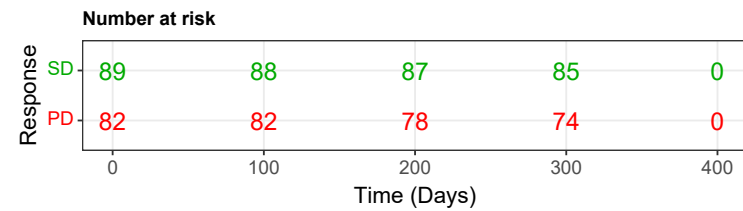

Supplement: Supplementary file 3 [file Supplementary Figure 3.pdf › Supplementary Figure 3.pdf]

**a****Absent vs I-II**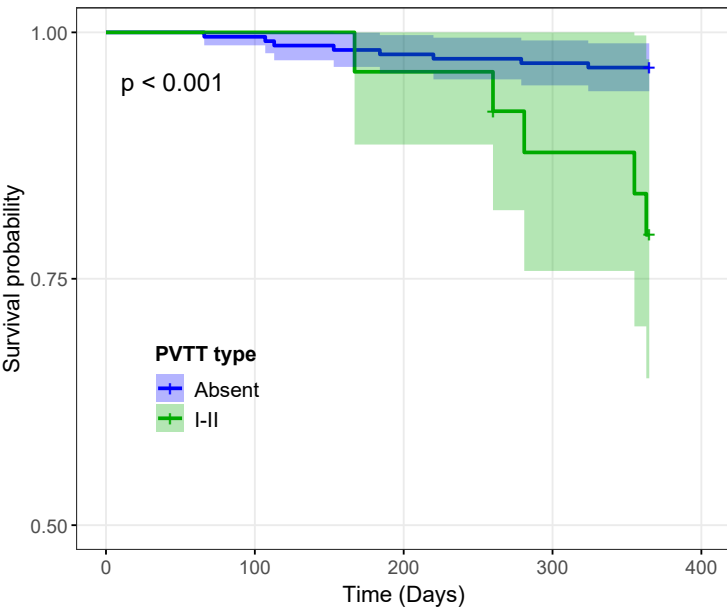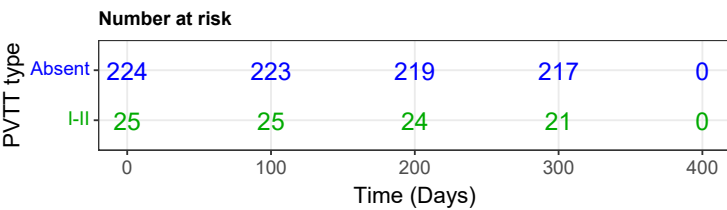**b****Absent vs III-IV**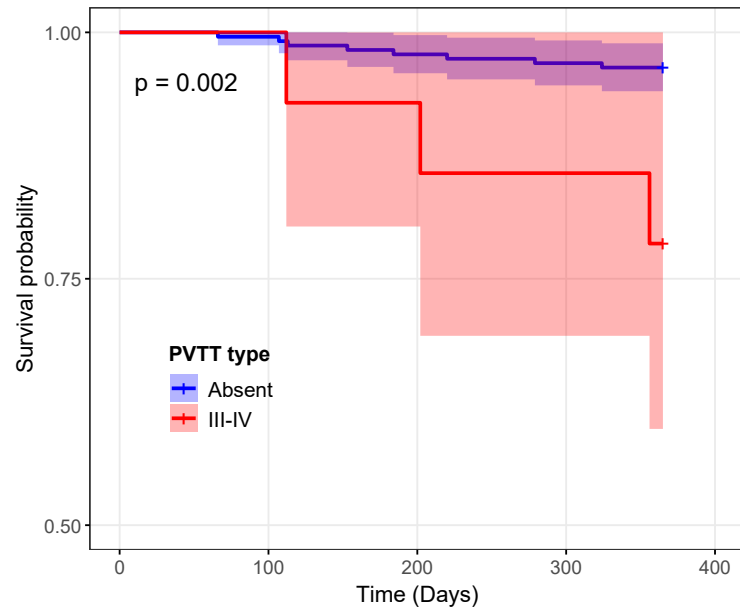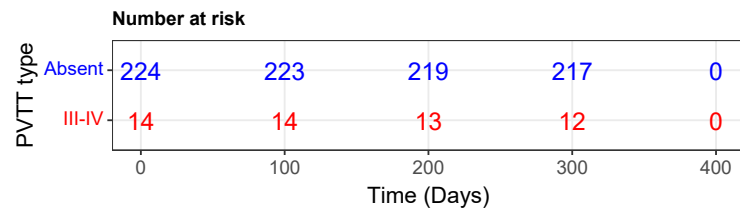**c****I-II vs III-IV**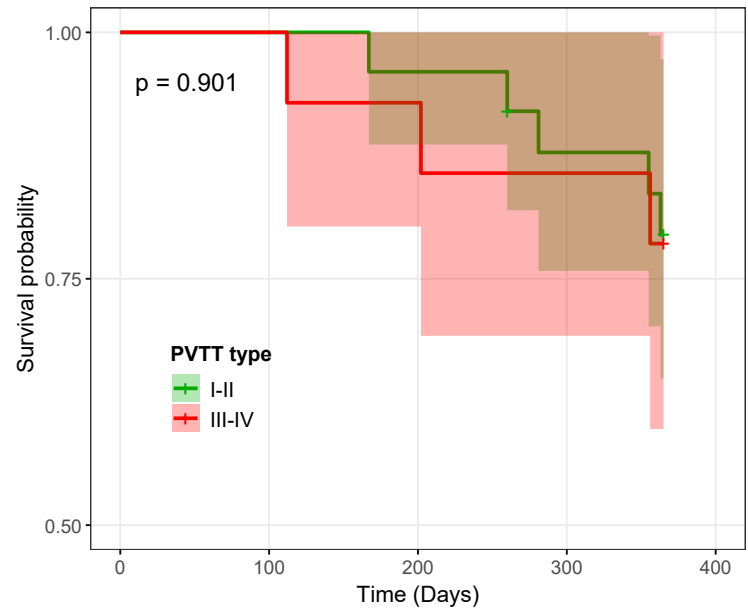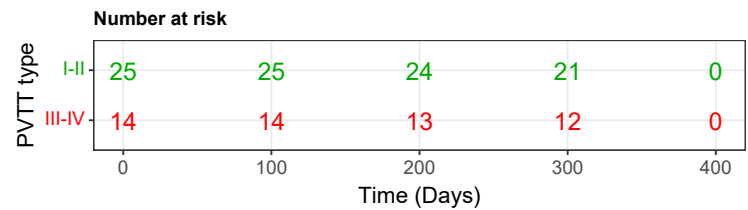

Supplement: Supplementary file 4 [file Supplementary Figure 4.pdf › Supplementary Figure 4.pdf]
